# Supplementary material for: Evolutionary conservation of Y Chromosome ampliconic gene families despite extensive structural variation
Source: HighWire-hosted journal article supplement (doi:10.1101/gr.237586.118), 2018-10-31
Supplement: Supplemental_Tables_S1-S9.xlsx [file Supplemental_Tables_S1-S9.xlsx]

## Sheet: Sup. Table S1
Supplemental Table S1. Sex-biased ratios in hybrid felid crosses.
Hybrid	Number of litters	Number of Males	Number of females	χ2
Liliger (F1 - female backcrossed to lion)	5	3	13	0.012
Tiliger (F1 - female backcrossed to Tiger)	2	5	3	0.48
Liger (F1 - male lion crossed to female lion)	2	1	6	0.059
Sources: http://www.ligercubs.com/liliger-cubs-in-russia, http://newsfeed.time.com/2013/06/20/meet-the-baby-liligers-born-in-a-russian-zoo, B. Davis: pers. comm.).

## Sheet: Sup. Table S2
Supplemental Table S2. Summary statistics of sequenced clones.
Sequence	Sequencing Platform	Length (bps)	Scaffold Number	Contig Number
Y1	PacBio	141646	1	1
Y2	Illumina MiSeq	133556	1	2
Y3	Illumina MiSeq	126499	1	4
Y4	PacBio	98469	1	1
Y5	PacBio	124712	1	1
Y6	Illumina MiSeq	106795	2	3
Y7	Illumina MiSeq	88899	1	4
Y8	Illumina MiSeq	112421	1	3
Y9	Illumina MiSeq	131753	1	1
Y10	Illumina MiSeq	96072	1	1
Y11	Illumina MiSeq	88866	1	3
Y12	PacBio	97069	1	1
Y13	Illumina MiSeq	126146	1	4
Y14	Illumina MiSeq	130729	1	4
Y15	PacBio	101612	1	1
Y16	Illumina MiSeq	123022	1	6
Y17	Illumina MiSeq	110508	1	8
Y18	PacBio	128903	1	1
Y19	Illumina MiSeq	90377	1	6
Y20	Illumina MiSeq	87106	1	6
Y21	Illumina MiSeq	137819	1	6
Total		2382979	22	67

## Sheet: Sup. Table S3
Supplemental Table S3. Comparison of assemblies from five clones that were sequenced using both the PacBio and Illumina MiSeq platforms.
Clone	Scaffold Name	Percent Identity (non-gapped sites)	%Recovered	Difference in scaffold length (MiSeq relative to PacBio)
529-O11	Y1	0.999	0.9783	-3066 bp
532-F8	Y4	0.9999	0.9998	-18 bp
544-B22	Y12	0.9996	0.9972	-275 bp
554-L9	Y15	0.9971	98.86%*	+1196 bp
572-E6	Y18	0.9977	98.24%*	+2310 bp
* Percent recovered here represents the length of the PacBio relative to the MiSeq assembly.

## Sheet: Sup. Table S4
Supplemental Table S4. Genomic locations of endogenous retrovirus-like element enriched on the X and Y chromosomes.
Chromosome	Starting Coordinate	Ending Coordinate	Span
Y1	40140	48105	7965
Y1	88473	95519	7046
Y2	102631	109716	7085
Y3	740	8583	7843
Y4	8805	17488	8683
Y4	52999	60592	7593
Y6	26430	34039	7609
Y8	35262	43006	7744
Y9	13366	19837	6471
Y13	1190	8835	7645
Y13	40510	48269	7759
Y17	46941	54149	7208
Y17	86371	93382	7011
Y20	91	7155	7064
Y20	33402	41065	7663
Y21	45901	53529	7628
Y21	94003	102090	8087
A1	85482384	85487265	4881
A1	88767735	88771512	3777
A1	146217963	146225092	7129
A2	59796103	59801107	5004
A2	120954342	120962444	8102
A3	37693462	37700759	7297
B1	103081754	103089007	7253
B2	1333322	1340637	7315
B2	60931815	60938592	6777
B3	11512987	11520795	7808
B3	21786796	21791559	4763
B3	25250740	25252928	2188
B3	25252977	25258137	5160
B3	25828442	25830633	2191
B4	33331656	33338913	7257
B4	54669776	54677103	7327
C1	75900467	75907467	7000
C1	94793576	94798423	4847
C1	140257381	140264983	7602
C2	152905899	152911634	5735
C2	158853997	158861004	7007
D1	4778056	4783554	5498
D1	98176398	98183721	7323
D1	103712988	103720210	7222
D4	62680	68048	5368
D4	5919578	5924807	5229
D4	77321472	77328770	7298
D4	86719513	86726521	7008
E2	23093905	23101059	7154
E2	41370362	41377670	7308
E3	16334152	16339671	5519
E3	30047358	30054445	7087
X	5710319	5717595	7276
X	33173610	33179337	5727
X	51377431	51384676	7245
X	55120561	55128078	7517
X	58071347	58076132	4785
X	59495513	59502594	7081
X	64127327	64134605	7278
X	64410031	64413185	3154
X	66354061	66357521	3460
X	72173107	72180406	7299
X	72948316	72955396	7080
X	74298044	74302033	3989
X	78647525	78654565	7040
X	82043789	82051086	7297
X	83551453	83554842	3389
X	88534648	88547735	13087

## Sheet: Sup. Table S5
Supplemental Table S5. Estimated copy numbers of Y-linked ampliconic genes and autosomal CCDC71L across Felidae based on whole genome sequencing data. Estimates for CCDC71L were made based on reads mapping to the flanking regions of this gene in females. This was done because a gap in the assembly within the coordinates of this gene precluded accurate mapping of reads and to avoid overestimates o…
Sample	Breed/Species	Sex	TSPY1ac	TSPY1b	5' CCDC71L	CCDC71L	3' CCDC71L	CCDC71LY	CUL4BY	TETY1	TETY1L	TETY2
SRR5040111	Domestic shorthair	Male	76	40	NA	NA	NA	205	18	82	17	2
SRR5040117	Domestic shorthair	Male	89	45	NA	NA	NA	250	22	103	22	2
SRR5040125	Domestic shorthair	Male	81	31	NA	NA	NA	266	17	117	22	2
SRR5055389	Domestic shorthair	Female	0	0	3	1	2	0	0	0	1	0
SRR5055404	Domestic shorthair	Male	84	44	NA	NA	NA	213	21	90	16	2
SRR5038380	Oriental shorthair	Male	108	40	NA	NA	NA	348	20	151	28	2
SRR5051114	Tennessee Rex	Male	96	51	NA	NA	NA	238	21	107	22	2
SRR5051115	Devon Rex	Female	0	0	2	1	2	0	0	0	1	0
SRR5055394	Domestic shorthair	Male	88	49	NA	NA	NA	213	20	90	17	2
SRR5043257	Himalayan	Male	91	50	NA	NA	NA	249	22	110	22	2
SRR5043264	Siamese	Male	93	50	NA	NA	NA	248	22	112	22	2
SRR5055397	Birman	Male	94	47	NA	NA	NA	243	21	103	18	2
SRR5055401	Burmese	Male	85	37	NA	NA	NA	247	19	106	15	2
SRR066071-SRR066075	European wild cat	Male	95	48	NA	NA	NA	270	20	111	26	NA
SRR2062538	Sand cat	Male	123	51	NA	NA	NA	231	16	126	36	15
SRR2511861	Black footed cat	Male	57	63	NA	NA	NA	93	38	32	18	21
SRR2737521	Cheetah	Male	75	101	NA	NA	NA	234	9	6	10	15
SRR2737544	Cheetah	Male	103	129	NA	NA	NA	213	5	4	7	2
SRR836361	Lion	Male	51	52	NA	NA	NA	48	6	40	45	8
SRR836370	Lion	Female	0	0	6	1	2	0	0	0	1	0
SRR3041429	Leopard	Female	0	0	6	1	3	0	0	0	1	0
SRR3042212	Leopard	Female	0	0	5	1	3	0	0	0	1	0
SRR1712667	Bengal Tiger	Female	0	0	4	3	4	0	0	0	1	0
SRR836311	Siberian tiger	Male	38	21	NA	NA	NA	104	6	13	27	2
SRR836354	Siberian tiger	Male	11	0	NA	NA	NA	108	7	23	17	6
SRR836372	Snow leopard	Female	0	0	7	1	4	0	0	0	1	0

## Sheet: Sup. Table S6
Supplemental Table S6. Copy number estimates based on quantitative real-time polymerase chain reactions conducted using tissues from male felids.
Species	TSPY1ac	TSPY1b	CCDC71L	CCDC71LY	TETY2
Domestic cat	96	88	1	124	3
Domestic cat	75	70	1	49	2
Chinese desert cat	130	96	1	128	7
Black footed cat	65	71	1	86	10
Jungle cat	71	48	1	110	82
Asian leopard cat	105	78	1	25	36
Asian leopard cat	166	66	1	48	40
Pallas cat	78	132	1	184	1
Iberian lynx	55	77	1	10	6
Margay	10	36	1	33	4
Pampas cat	35	64	1	36	3
Serval	52	105	1	43	65
Lion	140	161	26	88	22
Lion	140	167	27	147	20
Leopard	118	95	25	280	15
Jaguar	117	101	17	31	20
Jaguar	90	44	21	44	29
Tiger	54	43	15	12	12
Snow leopard	53	49	25	61	46
Clouded leopard	50	114	18	99	2

## Sheet: Sup. Table S7
Supplemental Table S7. NCBI SRA reads used for tissue expression analysis of Y-linked ampliconic genes.
SRA	Description	Tissue	Sex	# of Bases	Disease/Noted Phenotype
SRR3200449	Fcat18309	Lung	Male	15.4G	Hydrocephaly
SRR3200450	Fcat17648	Fetus	Male	25.2G	NA
SRR3200451	Fcat18309	Muscle	Male	13.4G	Hydrocephaly
SRR3200462	Fcat11894	Testes	Male	7.2Gb	Polycystic kidney disease
SRR3200469	Fcat18309	Pancreas	Male	20.8G	Hydrocephaly
SRR3200471	Fcat18309	Heart	Male	26.9G	Hydrocephaly
SRR3200473	Fcat11894	Kidney	Male	11.8G	Polycystic kidney disease
SRR3218718	Fcat11894	Cerebellum	Male	5.8G	Polycystic kidney disease
SRR1981105	FCA_4048	Testis	Male	3.4G	NA

## Sheet: Sup. Table S8
Supplemental Table S8. Primers designed for qPCR based on multi-species alignments of known ampliconic Y-linked genes.
Locus	Forward	Reverse
DDX3Y	GAGATTCAGCGGAGGATTTG	CTGCTGCTGCTGTGACTACC
TSPY1ac	GGGTGTGAGATACAGGTGGC	CTTCTGGCTTGGCTTCCTCA
TSPY1b	CTACAGACGCAGGCATGACA	CCCTCTCAGTKCTCTCTCCT
CCDC71L	GCAGCCAGATTTTACTGCAA	AGAAGCTGCCAAGCAGAGAG
CCDC71LY	CCAAGTCCTCGGAGTAAACC	TTCATCCCTCCAGGCACAAC
CLDN34Y	GTGTGGGAGTTTAACAGC	GCCCTGCCCATACCAGATTT

## Sheet: Sup. Table S9
Supplemental Table S9. Samples downloaded from NCBI SRA database used for in silico estimates of copy number variations of Y-linked ampliconic genes.
Sample	Breed/Species	Sex
SRR5040111	Domestic shorthair	Male
SRR5040117	Domestic shorthair	Male
SRR5040125	Domestic shorthair	Male
SRR5055389	Domestic shorthair	Female
SRR5055404	Domestic shorthair	Male
SRR5038380	Oriental shorthair	Male
SRR5051114	Tennessee Rex	Male
SRR5051115	Devon Rex	Female
SRR5055394	Domestic shorthair	Male
SRR5043257	Himalayan	Male
SRR5043264	Siamese	Male
SRR5055397	Birman	Male
SRR5055401	Burmese	Male
SRR066071-SRR066075	European wild cat	Male
SRR2062538	Sand cat	Male
SRR2511861	Black footed cat	Male
SRR2737521	Cheetah	Male
SRR2737544	Cheetah	Male
SRR836361	Lion	Male
SRR836370	Lion	Female
SRR3041429	Amur leopard	Female
SRR3042212	Amur leopard	Female
SRR1712667	Bengal Tiger	Female
SRR836311	Siberian tiger	Male
SRR836354	Siberian tiger	Male
SRR836372	Snow leopard	Female
